# Supplementary material for: Utilization of pomegranate waste-peel as a novel substrate for biodiesel production by Bacillus cereus (MF908505)
Source: Royal Society of Chemistry journal article supplement (doi:10.1039/c9se00584f), 2019-12-17
Supplement: c9se00584f1.pdf [file c9se00584f1.pdf]

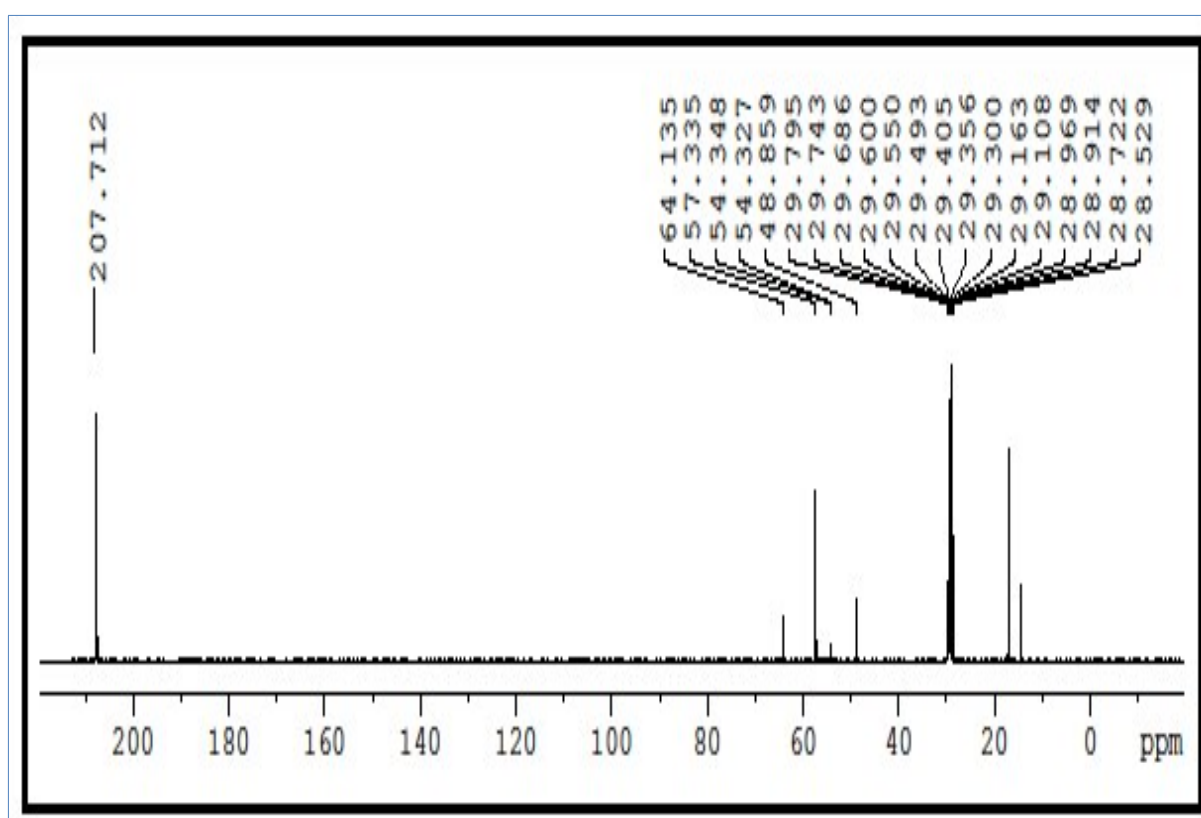

**Supplementary Figure 1.**  $^{13}\text{C}$  NMR Spectrum of Biodiesel

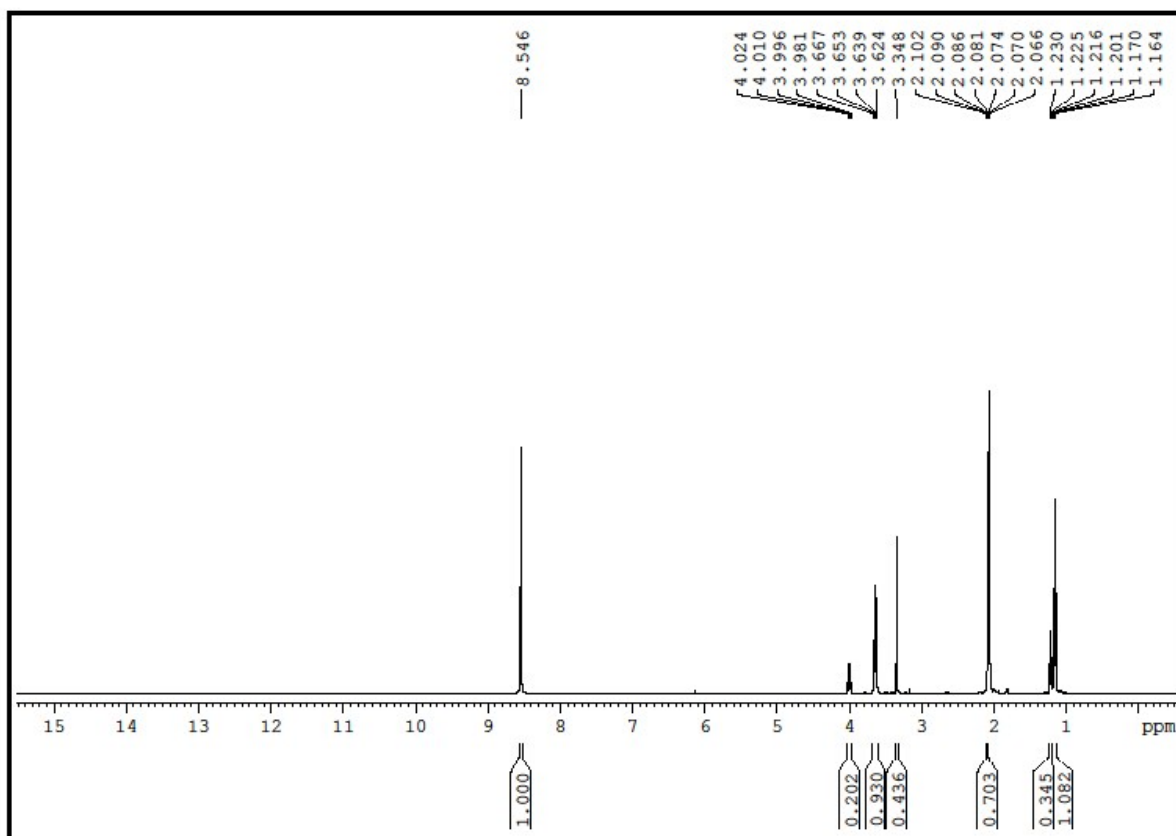

Supplementary Figure 2. <sup>1</sup>H NMR of obtained Biodiesel

| Peak Report TIC |        |           |        |                                                              |
|-----------------|--------|-----------|--------|--------------------------------------------------------------|
| Peak#           | R.Time | Area      | Area%  | Name                                                         |
| 1               | 7.511  | 14052096  | 7.05   | BENZALDEHYDE, 2,5-BIS[(TRIMETHYLSILYL)OXY]-                  |
| 2               | 8.055  | 30837030  | 15.48  | BENZENE, 3-FLUORO-1,2,4,5-TETRAMETHYL-                       |
| 3               | 8.575  | 3372823   | 1.69   | 2-(1,3-BENZODIOXOL-5-YL)-1-METHYL-4(1H)-QUINO                |
| 4               | 8.817  | 329826    | 0.17   | Silicic acid, diethyl bis(trimethylsilyl) ester              |
| 5               | 8.881  | 1560985   | 0.78   | CYCLOPENTASILOXANE, DECAMETHYL-                              |
| 6               | 9.178  | 726305    | 0.36   | BIS(2,3,4,5-TETRAMETHYLPHENYL)                               |
| 7               | 9.590  | 37661366  | 18.90  | 4B,5A-DIHYDRO-5H-DIBENZ[3,4 : 5,6]ANTHRA[1,2-B]              |
| 8               | 9.738  | 1780707   | 0.89   | 1-(METHOXY-(E,Z)-METHYLIDENE)-2-(-(5-(TRIMETHY               |
| 9               | 10.171 | 3639400   | 1.83   | 4B,5A-DIHYDRO-5H-DIBENZ[3,4 : 5,6]ANTHRA[1,2-B]              |
| 10              | 10.336 | 676053    | 0.34   | (+)-(2-ACETOXY-1-NAPHTHYL)METHYLPHENYLPHO                    |
| 11              | 10.461 | 1260690   | 0.63   | FUMARYLACETOACETIC ACID 4TMS                                 |
| 12              | 10.663 | 5964449   | 2.99   | 7-CHLORO-1,3-DIHYDRO-5-PHENYL-2H-1,4-DIBENZO                 |
| 13              | 10.887 | 3123391   | 1.57   | SILANE, [1,3,5-BENZENETRIS(OLYL)TRIS(OLYL)TRIS(OLYL)         |
| 14              | 11.193 | 1962243   | 0.98   | (+)- BETA -YOHIMBINE                                         |
| 15              | 11.486 | 3337070   | 1.68   | GUANINE-8-AZA-N2,O6,9-TRITMS                                 |
| 16              | 11.624 | 5253683   | 2.64   | 3,5-Bis[dimethyl(tert-butyl)silyloxy]styrene                 |
| 17              | 11.740 | 5203121   | 2.61   | BIS(TRIMETHYLSILYL) DERIVATIVE OF PHOSPHORU                  |
| 18              | 11.916 | 2452353   | 1.23   | Phenol, 4,4'-(1-methylethylidene)bis[2,6-dimethyl-           |
| 19              | 12.490 | 1590846   | 0.80   | 2,6-Diphtalimidopyridine                                     |
| 20              | 12.628 | 10469699  | 5.26   | 1-(P-NITROPHENYL)-4-(2-IMIDAZOLINYL)-5-(P-CHLO               |
| 21              | 13.429 | 1244095   | 0.62   | Benzenesulfonic acid, methyl ester                           |
| 22              | 13.551 | 1637138   | 0.82   | N1,N1,N4-Tris(tert-butyltrimethylsilyl)succinamide           |
| 23              | 17.683 | 3646271   | 1.83   | [1,3]-Oxazino[5,6-c]quinoline,3-(3,4-methylenedioxybenzyl)   |
| 24              | 18.244 | 14132435  | 7.09   | MESO-DIMETHYL-R-3,C-6-BIS[(TERT-BUTYLDIMETH                  |
| 25              | 18.515 | 3444851   | 1.73   | 1,3,5,7,9-Pentaethylbicyclo[5.3.1]pentasiloxane              |
| 26              | 20.318 | 3144787   | 1.58   | (PENTAMETHYLCYCLOPENTADIENYL)PLUMBUM(I                       |
| 27              | 20.850 | 9293418   | 4.66   | Bis(trimethylsilyl)-2-[hydroxy-tris(ethoxy)phenyl]-2-[hydrox |
| 28              | 22.719 | 3020751   | 1.52   | BENZOIC ACID, 2,6-BIS(TRIMETHYLSILOXY)-, TRIM                |
| 29              | 23.963 | 24398832  | 12.25  | (4-CHLORO-PHENYL)-[4-(4-METHOXY-PHENYL)-2,2,4                |
|                 |        | 199216714 | 100.00 |                                                              |

### Supplementary data 3. GC-MS Peak data of obtained Biodiesel
